# Supplementary material
Source: MDPI journal article supplement (https://www.mdpi.com/2073-4395/11/4/698)
Supplement: s1 [file s1]

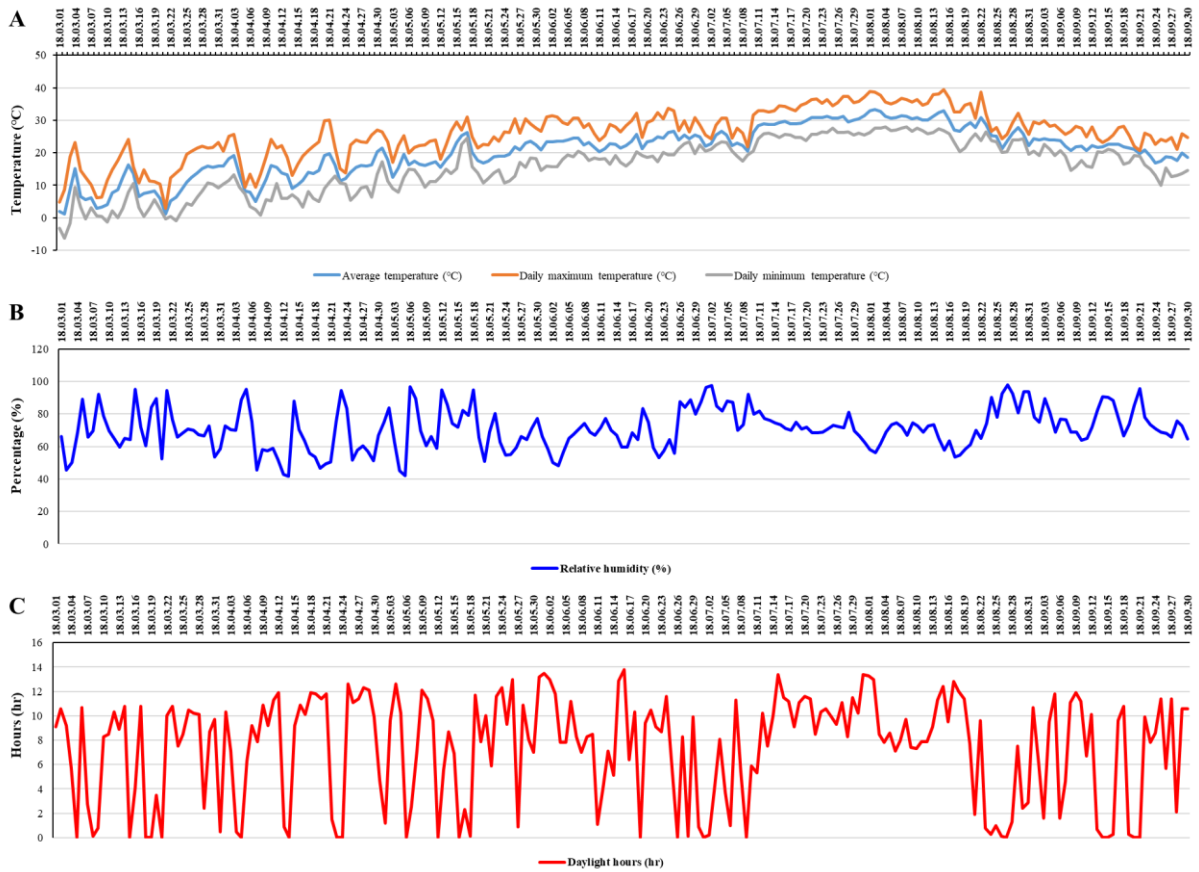

**Figure S1.** Temperature conditions (A), relative humidity (B), and daylight hours (C) in Chungnam National University, Daejeon, Korea (36°22'08.0" N 127°21'14.2" E)

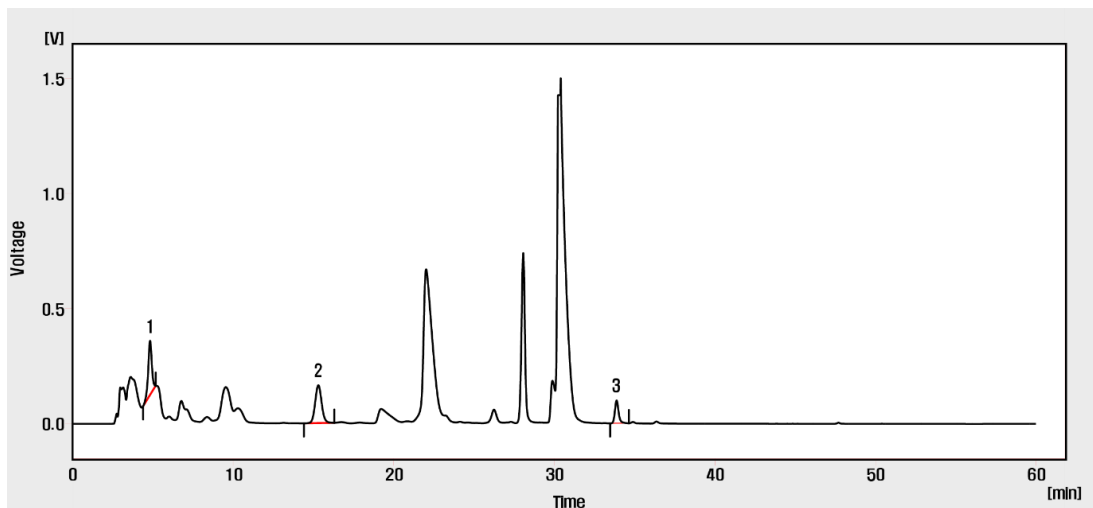

**Figure S2.** Representative chromatogram of rosmarinic acid, tilianin, and acacetin obtained from freeze-dried *Agastache rugosa*. Peak: 1. Rosmarinic acid; 2. Tilianin; 3. Acacetin.

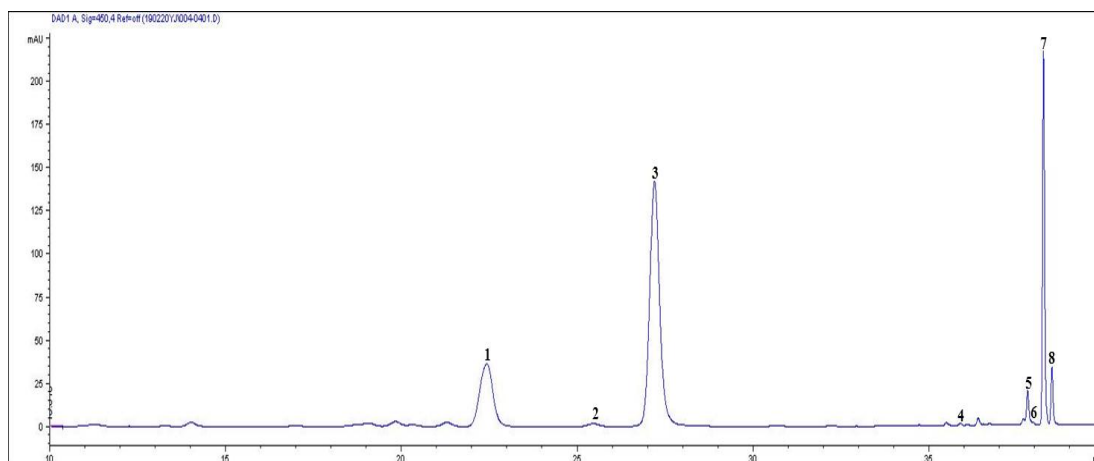

**Figure S3.** Representative chromatogram of carotenoids obtained from freeze-dried *Agastache rugosa*. Peak: 1. Lutein; 2. Zeaxanthin; 3. *trans*- $\beta$ -apo-8'-carotenal (internal standard); 4.  $\beta$ -Cryptoxanthin; 5. 13Z- $\beta$ -Carotene; 6.  $\alpha$ -Carotene; 7.  $\beta$ -Carotene; 8. 9Z- $\beta$ -Carotene.

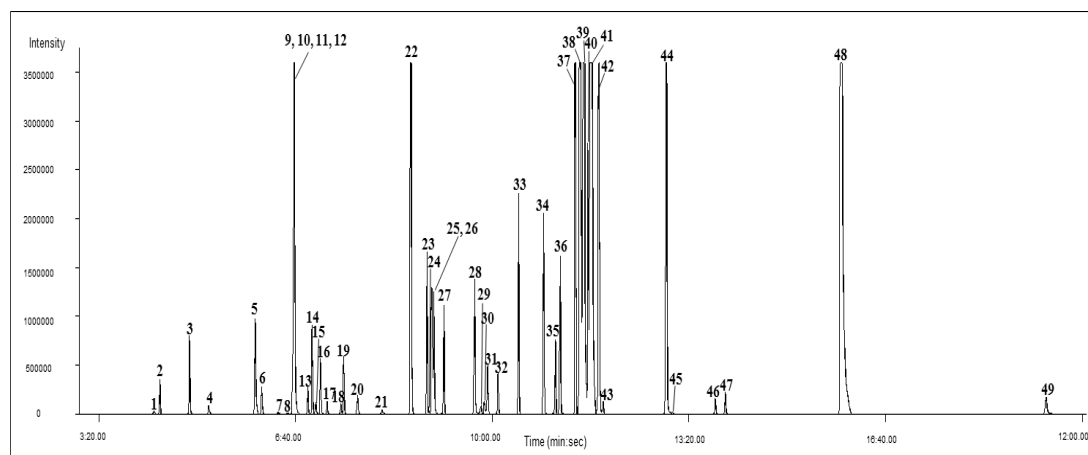

**Figure S4.** Representative chromatogram of metabolites obtained from freeze-dried *Agastache rugosa*. Peak: 1, Pyruvic acid; 2, Lactic Acid; 3, Alanine; 4, Oxalic acid; 5, Glycolic acid; 6, Valine; 7, Urea; 8, Ethanolamine; 9, Phosphoric acid; 10, Glycerol; 11, Leucine; 12, Isoleucine; 13, Proline; 14, Glycine; 15, Succinic Acid; 16, Glyceric Acid; 17, Fumaric Acid; 18, Serine; 19, Threonine; 20,  $\beta$ -Alanine; 21, Malic acid; 22, Aspartic Acid; 23, Methionine; 24, Pyroglutamic Acid; 25, 4-Aminobutyric Acid; 26, Threonic acid; 27, Glutamic Acid; 28, Phenylalanine; 29, Xylose-1; 30, Xylose-2; 31, Asparagine; 32, Ribitol (internal standard) 33, Glutamine; 34, Shikimic acid; 35, Citric acid; 36, Quinic acid; 37, Fructose-1; 38, Fructose-2; 39, Galactose; 40, Glucose-1; 41, Glucose-2; 42, Mannitol; 43, Inositol; 44, Ferulic acid; 45, Tryptophan; 46, Sinapinic acid; 47, Sucrose; and 48, Raffinose.

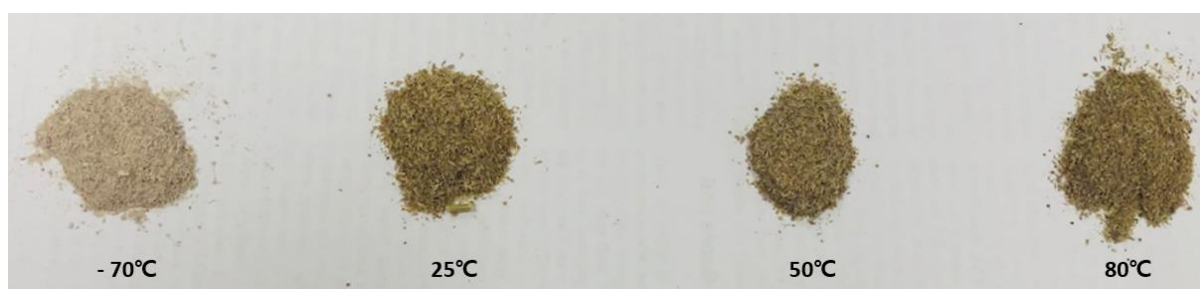

**Figure S5.** *Agastache rugosa* flower samples were dried using four different methods (oven drying at  $25 \pm 1$  °C,  $50 \pm 1$  °C,  $80 \pm 1$  °C, and freeze drying).

**Table S1.** HPLC and GC-TOFMS analysis methods.

|                                                  |                                                                                                                                                                                                                                                                                                                                                                                                                                                                                                                                                                                                                                                                                                                                                                                                                |                                                                                                                                            |
|--------------------------------------------------|----------------------------------------------------------------------------------------------------------------------------------------------------------------------------------------------------------------------------------------------------------------------------------------------------------------------------------------------------------------------------------------------------------------------------------------------------------------------------------------------------------------------------------------------------------------------------------------------------------------------------------------------------------------------------------------------------------------------------------------------------------------------------------------------------------------|--------------------------------------------------------------------------------------------------------------------------------------------|
| HPLC analysis method for polyphenols             | HPLC system                                                                                                                                                                                                                                                                                                                                                                                                                                                                                                                                                                                                                                                                                                                                                                                                    | An NS-4000 HPLC system (Futecs Co., Daejeon, South Korea) with a UV-Vis detector, a NS-6000 autosampler (Futecs Co., Daejeon, South Korea) |
|                                                  | Column                                                                                                                                                                                                                                                                                                                                                                                                                                                                                                                                                                                                                                                                                                                                                                                                         | OptimaPak C18 column (250 × 4.6 mm, 5 μm, RStech Co., Daejeon, South Korea)                                                                |
|                                                  | UV wavelength                                                                                                                                                                                                                                                                                                                                                                                                                                                                                                                                                                                                                                                                                                                                                                                                  | 280 nm                                                                                                                                     |
|                                                  | Flow rate                                                                                                                                                                                                                                                                                                                                                                                                                                                                                                                                                                                                                                                                                                                                                                                                      | 1.0 mL/min                                                                                                                                 |
|                                                  | Injection volume                                                                                                                                                                                                                                                                                                                                                                                                                                                                                                                                                                                                                                                                                                                                                                                               | 20 μL                                                                                                                                      |
|                                                  | Column temperature                                                                                                                                                                                                                                                                                                                                                                                                                                                                                                                                                                                                                                                                                                                                                                                             | 30°C.                                                                                                                                      |
| HPLC analysis method for carotenoids             | HPLC system                                                                                                                                                                                                                                                                                                                                                                                                                                                                                                                                                                                                                                                                                                                                                                                                    | HPLC system (Agilent 1000) equipped with PDA-detector (450 nm)                                                                             |
|                                                  | Column                                                                                                                                                                                                                                                                                                                                                                                                                                                                                                                                                                                                                                                                                                                                                                                                         | C30 YMC column (250 × 4.6 mm, 3 μm; Waters Corporation, Milford, MA, USA)                                                                  |
|                                                  | UV wavelength                                                                                                                                                                                                                                                                                                                                                                                                                                                                                                                                                                                                                                                                                                                                                                                                  | 450 nm                                                                                                                                     |
|                                                  | Flow rate                                                                                                                                                                                                                                                                                                                                                                                                                                                                                                                                                                                                                                                                                                                                                                                                      | 1.0 mL/min                                                                                                                                 |
|                                                  | Injection volume                                                                                                                                                                                                                                                                                                                                                                                                                                                                                                                                                                                                                                                                                                                                                                                               | 20 μL                                                                                                                                      |
|                                                  | Column temperature                                                                                                                                                                                                                                                                                                                                                                                                                                                                                                                                                                                                                                                                                                                                                                                             | 40°C.                                                                                                                                      |
| GC-TOFMS analysis method for primary metabolites | Agilent 7890A gas chromatograph (Agilent, Atlanta, GA, USA) combined with a Pegasus HT TOF mass spectrometer (LECO, St. Joseph, MI, USA). The gas chromatograph was equipped with a CP-Sil 8 CB low bleed/MS fused-silica capillary column (5% phenyl/95% dimethylpolysiloxane, 60 m × 0.25 mm ID, 0.25-μm film thickness; Varian Inc., Palo Alto, CA, USA). The operating conditions were set as follow: injection port temperature, 230 °C; helium gas flow rate, 1.0 mL min <sup>-1</sup> ; split ratio, 1:25. The temperature program was set as follows: initial temperature of 80 °C, 2 min; an increase to 320 °C at 15 °C/min; 10 min heating at 320 °C; transfer line temperature, 250 °C; the ion source temperatures, 200 °C; the scanned mass range, m/z 85–600; and the detector voltage, 1700 V. |                                                                                                                                            |
